# Supplementary material
Source: bioRxiv or medRxiv preprint supplement (https://www.biorxiv.org/highwire/filestream/74190/field_highwire_adjunct_files/0/136515-1.pdf)
Supplement: Supplementary file [file 136515-1.pdf]

# No evidence that more physically attractive women have higher estradiol or progesterone

Code ▾

BC Jones et al. ([ben.jones@glasgow.ac.uk](mailto:ben.jones@glasgow.ac.uk) (<mailto:ben.jones@glasgow.ac.uk>))

Hide

```
# Load packages
library(tidyverse)
library(lmerTest)
library(viridis)
library(rsm)
library(knitr)
sessionInfo()
```

```
R version 3.4.1 (2017-06-30)
Platform: x86_64-apple-darwin15.6.0 (64-bit)
Running under: macOS Sierra 10.12.6

Matrix products: default
BLAS: /System/Library/Frameworks/Accelerate.framework/Versions/A/Frameworks/vecLib.framework/Versions/A/libBLAS.dylib
LAPACK: /Library/Frameworks/R.framework/Versions/3.4/Resources/lib/libRlapack.dylib

locale:
[1] en_GB.UTF-8/en_GB.UTF-8/en_GB.UTF-8/C/en_GB.UTF-8/en_GB.UTF-8

attached base packages:
[1] stats      graphics  grDevices  utils      datasets  methods   base

other attached packages:
[1] bindrcpp_0.2      knitr_1.15.1      rsm_2.8           viridis_0.4.0     viridisLite_0.2.0
[6] lmerTest_2.0-33  lme4_1.1-13       Matrix_1.2-10    dplyr_0.7.4       purrr_0.2.3
[11] readr_1.1.1      tidyr_0.7.1       tibble_1.3.4     ggplot2_2.2.1     tidyverse_1.1.1

loaded via a namespace (and not attached):
[1] httr_1.3.1        jsonlite_1.5       splines_3.4.1      modelr_0.1.1       Formula_1.2-1
[6] assertthat_0.2.0 latticeExtra_0.6-28 cellranger_1.1.0   backports_1.0.5    lattice_0.20-35
[11] glue_1.1.1        digest_0.6.12      RColorBrewer_1.1-2 checkmate_1.8.2    rvest_0.3.2
[16] minga_1.2.4       sandwich_2.4-0     colorspace_1.3-2  htmltools_0.3.6    plyr_1.8.4
[21] psych_1.7.3.21    pkgconfig_2.0.1    broom_0.4.2        haven_1.1.0        xtable_1.8-2
[26] mvtnorm_1.0-6     scales_0.4.1       lsmeans_2.27-2    htmlTable_1.9      TH.data_1.0-8
[31] nnet_7.3-12       lazyeval_0.2.0     mnormt_1.5-5      survival_2.41-3    magrittr_1.5
[36] readxl_1.0.0      estimability_1.2   nlme_3.1-131      MASS_7.3-47        forcats_0.2.0
[41] xml2_1.1.1        foreign_0.8-69     tools_3.4.1       data.table_1.10.4  hms_0.3
[46] multcomp_1.4-7    stringr_1.2.0      munsell_0.4.3     cluster_2.0.6      compiler_3.4.1
[51] rlang_0.1.2       grid_3.4.1         nloptr_1.0.4      htmlwidgets_0.9    base64enc_0.1-3
[56] codetools_0.2-15 gtable_0.2.0       reshape2_1.4.2    R6_2.2.0           zoo_1.8-0
[61] gridExtra_2.2.1   lubridate_1.6.0    bindr_0.1         Hmisc_4.0-2        stringi_1.1.5
[66] parallel_3.4.1   Rcpp_0.12.10      rpart_4.1-11     acepack_1.4.1      tidyselect_0.1.1
[71] coda_0.19-1
```

Hide

```
# read in the raw data
raw <- read_csv("ratings_anon.csv")
```

## Remove outlier hormone values

Remove values below bottom sensitivity thresholds for assays (progesterone < 5, estrogen < 0.1). Remove outlier values (+/- 3SD from the mean).

Hide

```

horm_no_outliers <- raw %>%
  mutate(
    rater_sex.e = ifelse(rater_sex=="male", 0.5, -0.5),
    prog1 = ifelse(progesterone >= 5, progesterone, NA),
    estr1 = ifelse(estradiol >= 0.1, estradiol, NA),
    prog = ifelse(prog1>mean(prog1, na.rm=TRUE)+3*sd(prog1, na.rm=TRUE) |
      prog1<mean(prog1, na.rm=TRUE)-3*sd(prog1, na.rm=TRUE), NA, prog1),
    estr = ifelse(estr1>mean(estr1, na.rm=TRUE)+3*sd(estr1, na.rm=TRUE) |
      estr1<mean(estr1, na.rm=TRUE)-3*sd(estr1, na.rm=TRUE), NA, estr1)
  )
# how many included?
horm_no_outliers %>%
  group_by(face_id, session) %>%
  summarise(
    e = is.na(mean(estr)),
    p = is.na(mean(prog))
  ) %>%
  ungroup() %>%
  select(e:p) %>%
  gather('hormone', 'na', e:p) %>%
  group_by(hormone) %>%
  summarise(
    'valid' = n() - sum(na),
    'excluded' = sum(na)
  ) %>%
  arrange(hormone) %>%
  group_by() %>%
  summarise(
    total_hormone_samples_valid = sum(valid),
    total_hormone_samples_excluded = sum(excluded)
  ) %>%
  gather("stat", "value", !! 1:length(.))

```

| stat                           | value |
|--------------------------------|-------|
| <chr>                          | <int> |
| total_hormone_samples_valid    | 2458  |
| total_hormone_samples_excluded | 32    |

2 rows

## Mean hormone values

Hide

```

horm_no_outliers %>%
  summarise(
    estr_mean = mean(estr, na.rm=TRUE),
    estr_sd = sd(estr, na.rm=TRUE),
    prog_mean = mean(prog, na.rm=TRUE),
    prog_sd = sd(prog, na.rm=TRUE)
  )

```

| estr_mean | estr_sd  | prog_mean | prog_sd  |
|-----------|----------|-----------|----------|
| <dbl>     | <dbl>    | <dbl>     | <dbl>    |
| 3.417601  | 1.327905 | 143.8992  | 93.33346 |

1 row

Hide

NA

## Center and scale hormones

Subject-mean-centre hormones (within), grand-mean-centre hormones (between), and divide by a constant to put all hormones on a similar scale for Imm analyses.

Hide

```

data_hormones <- horm_no_outliers %>%
group_by(face_id) %>%
  mutate(prog.current.s=(prog-mean(prog, na.rm=TRUE))/400,
         estr.current.s=(estr-mean(estr, na.rm=TRUE))/5,
         prog.m = mean(prog, na.rm=TRUE),
         estr.m = mean(estr, na.rm=TRUE)) %>%
ungroup() %>%
as.data.frame() %>%
mutate(prog.mean.s = (prog.m - mean(prog.m, na.rm=TRUE))/400,
       estr.mean.s = (estr.m - mean(estr.m, na.rm=TRUE))/5) %>%
filter(!is.na(prog.current.s) & !is.na(estr.current.s))

```

## Graph hormone distributions

Hide

```

data_hormones %>%
group_by(face_id, session, prog.current.s, estr.current.s, prog.mean.s, estr.mean.s) %>%
summarise(n = n()) %>%
ungroup() %>%
gather("hormone", "value", prog.current.s:estr.mean.s) %>%
ggplot(aes(value, colour=hormone)) +
geom_density(alpha=.5) +
scale_x_continuous(limits = c(-1,1))

```

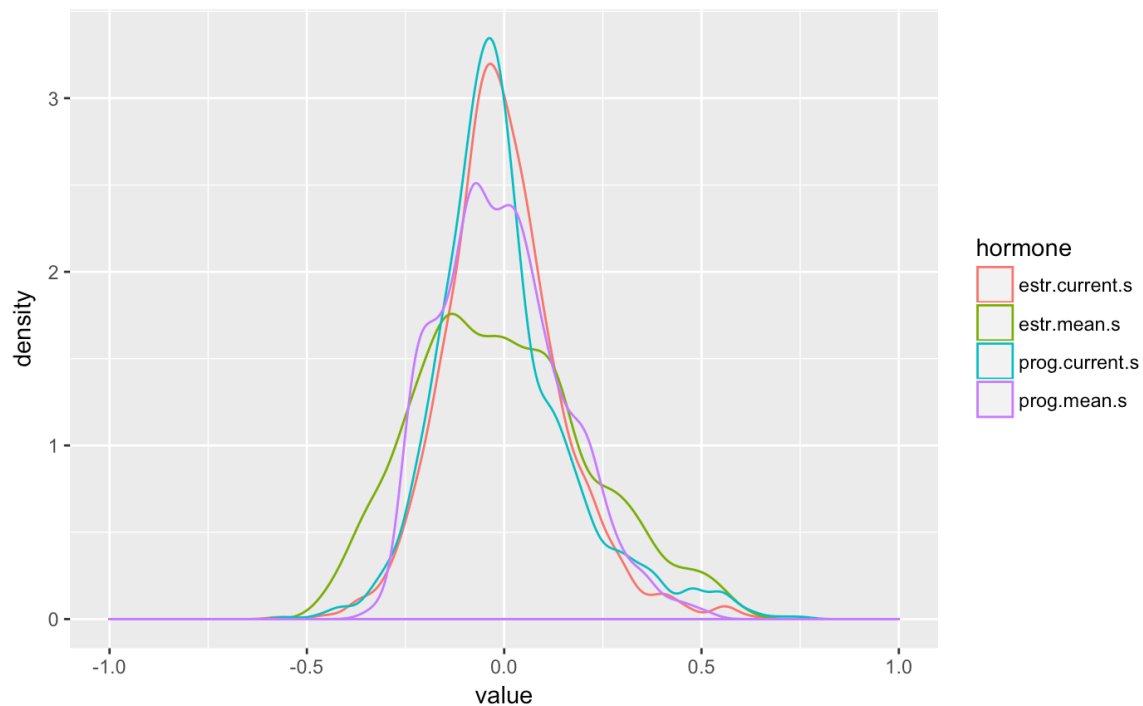

Hide

NA

## Model within-woman E and P & between-women E and P

- rating = attractiveness rating on 1 (much less attractive than average) to 7 (much more attractive than average) scale
- rater\_sex.e = rater sex (effect-coded as -0.5 is female and +0.5 is male)
- estr.current.s = current (i.e., state) estradiol (subject-specific mean centered and divided by 5 to rescale from pg/mL)
- prog.current.s = current (i.e., state) progesterone (subject-specific mean centered and divided by 400 to rescale from pg/mL)
- estr.mean.s = mean (i.e., trait) estradiol (grand mean centered and divided by 5 to rescale from pg/mL)
- prog.mean.s = mean (i.e., trait) progesterone (grand mean centered and divided by 400 to rescale from pg/mL)

Hide

```
fit.ep <- lmer(rating ~ estr.current.s * prog.current.s * rater_sex.e + estr.mean.s * prog.mean.s * rater_sex.e +
              (1 | face_id) +
              (0 + estr.current.s:prog.current.s:rater_sex.e || face_id) +
              (1 | rater_id) +
              (0 + estr.current.s:prog.current.s + estr.mean.s:prog.mean.s || rater_id) +
              (1 | face_id:session) +
              (0 + rater_sex.e || face_id:session),
              data = data_hormones,
              REML = FALSE)
model.ep <- summary(fit.ep)
model.ep
```

Linear mixed model fit by maximum likelihood t-tests use Satterthwaite approximations to degrees of freedom [lmerMod]

```
Formula: rating ~ estr.current.s * prog.current.s * rater_sex.e + estr.mean.s *
  prog.mean.s * rater_sex.e + (1 | face_id) + ((0 + estr.current.s:prog.current.s:rater_sex.e |
  face_id) + (1 | rater_id) + ((0 + estr.current.s:prog.current.s |
  rater_id) + (0 + estr.mean.s:prog.mean.s | rater_id)) + (1 |
  face_id:session) + ((0 + rater_sex.e | face_id:session))
Data: data_hormones
```

| AIC     | BIC     | logLik   | deviance | df.resid |
|---------|---------|----------|----------|----------|
| 97997.4 | 98182.9 | -48976.7 | 97953.4  | 33942    |

Scaled residuals:

| Min     | 1Q      | Median  | 3Q     | Max    |
|---------|---------|---------|--------|--------|
| -4.5605 | -0.6402 | -0.0453 | 0.5939 | 4.6089 |

Random effects:

| Groups            | Name                                      | Variance  | Std.Dev. |
|-------------------|-------------------------------------------|-----------|----------|
| face_id.session   | rater_sex.e                               | 0.0004693 | 0.02166  |
| face_id.session.1 | (Intercept)                               | 0.0140364 | 0.11848  |
| face_id           | estr.current.s:prog.current.s:rater_sex.e | 3.1125215 | 1.76423  |
| face_id.1         | (Intercept)                               | 0.4406590 | 0.66382  |
| rater_id          | estr.mean.s:prog.mean.s                   | 0.7026012 | 0.83821  |
| rater_id.1        | estr.current.s:prog.current.s             | 0.0294292 | 0.17155  |
| rater_id.2        | (Intercept)                               | 0.4546629 | 0.67429  |
| Residual          |                                           | 1.0001873 | 1.00009  |

Number of obs: 33964, groups: face\_id:session, 1213; face\_id, 249; rater\_id, 28

Fixed effects:

|                                           | Estimate   | Std. Error | df        | t value | Pr(> t )   |
|-------------------------------------------|------------|------------|-----------|---------|------------|
| (Intercept)                               | 3.118e+00  | 1.353e-01  | 3.540e+01 | 23.041  | <2e-16 *** |
| estr.current.s                            | -1.047e-02 | 4.518e-02  | 9.643e+02 | -0.232  | 0.8168     |
| prog.current.s                            | -6.518e-02 | 3.935e-02  | 9.645e+02 | -1.657  | 0.0979 .   |
| rater_sex.e                               | -6.973e-01 | 2.551e-01  | 2.800e+01 | -2.733  | 0.0108 *   |
| estr.mean.s                               | -1.525e-01 | 2.095e-01  | 2.484e+02 | -0.728  | 0.4673     |
| prog.mean.s                               | -6.029e-02 | 2.885e-01  | 2.492e+02 | -0.209  | 0.8346     |
| estr.current.s:prog.current.s             | -5.366e-01 | 2.438e-01  | 8.370e+01 | -2.201  | 0.0305 *   |
| estr.current.s:rater_sex.e                | 1.779e-02  | 7.762e-02  | 1.198e+03 | 0.229   | 0.8188     |
| prog.current.s:rater_sex.e                | -2.424e-02 | 6.807e-02  | 1.075e+03 | -0.356  | 0.7219     |
| estr.mean.s:prog.mean.s                   | 6.880e-01  | 1.220e+00  | 2.546e+02 | 0.564   | 0.5732     |
| rater_sex.e:estr.mean.s                   | -7.087e-04 | 5.442e-02  | 1.210e+03 | -0.013  | 0.9896     |
| rater_sex.e:prog.mean.s                   | -8.999e-02 | 7.671e-02  | 1.212e+03 | -1.173  | 0.2410     |
| estr.current.s:prog.current.s:rater_sex.e | 4.154e-01  | 4.427e-01  | 3.040e+01 | 0.938   | 0.3555     |
| rater_sex.e:estr.mean.s:prog.mean.s       | 2.311e-01  | 4.487e-01  | 2.770e+01 | 0.515   | 0.6107     |

---  
Signif. codes: 0 '\*\*\*' 0.001 '\*\*' 0.01 '\*' 0.05 '.' 0.1 ' ' 1

Correlation matrix not shown by default, as p = 14 > 12.

Use `print(x, correlation=TRUE)` or  
`vcov(x)` if you need it

Hide

```
confint(fit.ep, method = "Wald") %>%
  as.data.frame() %>%
  rownames_to_column() %>%
  filter(!is.na(`2.5 %`)) %>%
  kable(digits = 3)
```

| rowname     | 2.5 % | 97.5 % |
|-------------|-------|--------|
| (Intercept) | 2.853 | 3.383  |

| rowname                                   | 2.5 %  | 97.5 % |
|-------------------------------------------|--------|--------|
| estr.current.s                            | -0.099 | 0.078  |
| prog.current.s                            | -0.142 | 0.012  |
| rater_sex.e                               | -1.197 | -0.197 |
| estr.mean.s                               | -0.563 | 0.258  |
| prog.mean.s                               | -0.626 | 0.505  |
| estr.current.s:prog.current.s             | -1.014 | -0.059 |
| estr.current.s:rater_sex.e                | -0.134 | 0.170  |
| prog.current.s:rater_sex.e                | -0.158 | 0.109  |
| estr.mean.s:prog.mean.s                   | -1.703 | 3.079  |
| rater_sex.e:estr.mean.s                   | -0.107 | 0.106  |
| rater_sex.e:prog.mean.s                   | -0.240 | 0.060  |
| estr.current.s:prog.current.s:rater_sex.e | -0.452 | 1.283  |
| rater_sex.e:estr.mean.s:prog.mean.s       | -0.648 | 1.111  |

## Graph of current E by current P interaction following Puts et al. (2013 Hormones & Behavior)

```

coded.data_hormones <- coded.data(data_hormones,
  formula = estr.current.co ~ estr.current.s,
            prog.current.co ~ prog.current.s,
            rater_sex.co ~ rater_sex.e,
            estr.mean.co ~ estr.mean.s,
            prog.mean.co ~ prog.mean.s,
            rater_sex.co ~ rater_sex.e)
model.rsm <- rsm(rating ~ F0(prog.mean.co, estr.mean.co, rater_sex.co) + TWI(estr.current.co, prog.current.co),
  data = coded.data_hormones)
persp(model.rsm, ~ estr.current.co + prog.current.co,
  zlab = "\nFacial Attractiveness",
  xlabs = c("\nEstradiol (centered)", "Progesterone (centered)"),
  col = viridis(256),
  border = "grey20",
  nticks = 3,
  atpos = 0,
  theta = 70,
  phi = 20,
  hook = list(
    pre.plot = function(lab) { png(file = "e_by_p.png", width = 7, height = 6, units = "in", res = 300) },
    post.plot = function(lab) { dev.off() }
  )
)

```

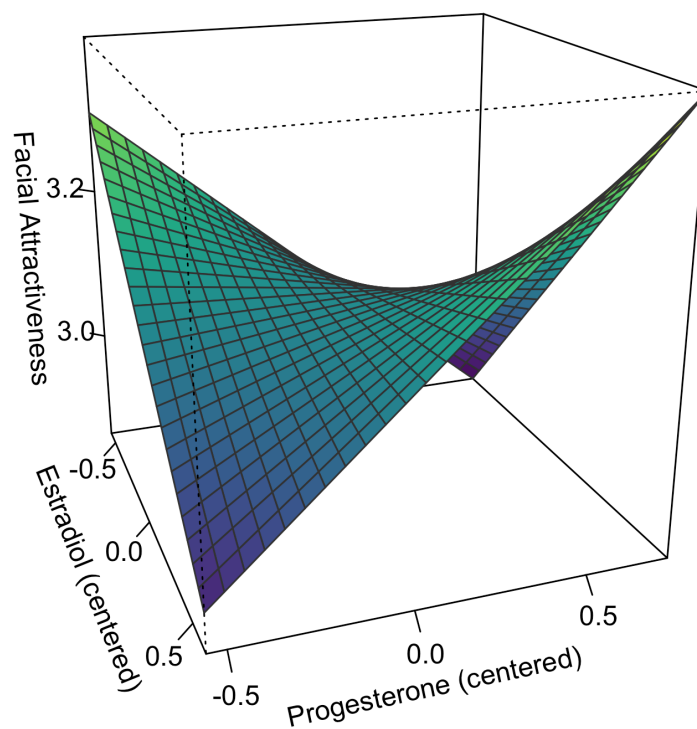

## Graph of current E by current P interaction

Fit data for prog.current.s and estr.current.s in grid from -0.5 to +0.5, holding all other variables constant at 0

Hide

```
fitdata = data.frame(
  prog.current.s = rep(seq(-.5, .5,length.out=100),each=100),
  estr.current.s = rep(seq(-.5, .5 ,length.out=100),times=100)
) %>%
mutate(
  prog.mean.s = 0,
  estr.mean.s = 0,
  rater_sex.e = 0,
  face_id = "F",
  rater_id = "R",
  session = rep(seq(1,5),length.out = 100*100)
)

pred_att = predict(fit.ep, newdata = fitdata, allow.new.levels = TRUE)
## graph estr.current.s by prog.current.s interaction
## multiply by scale constants (e = 5, p = 400) to put back on pg/mL centered
e_by_p2 <- fitdata %>%
  mutate(pred = pred_att) %>%
  ggplot(aes(prog.current.s*400, estr.current.s*5, fill=pred)) +
  scale_fill_viridis() +
  geom_tile() +
  ylab("Estradiol (pg/mL) centered on subject-specific means") +
  xlab("Progesterone (pg/mL) centered on subject-specific means") +
  labs(fill="Attractiveness")
ggsave("e_by_p_flat.png", width = 7, height = 5.5)
```

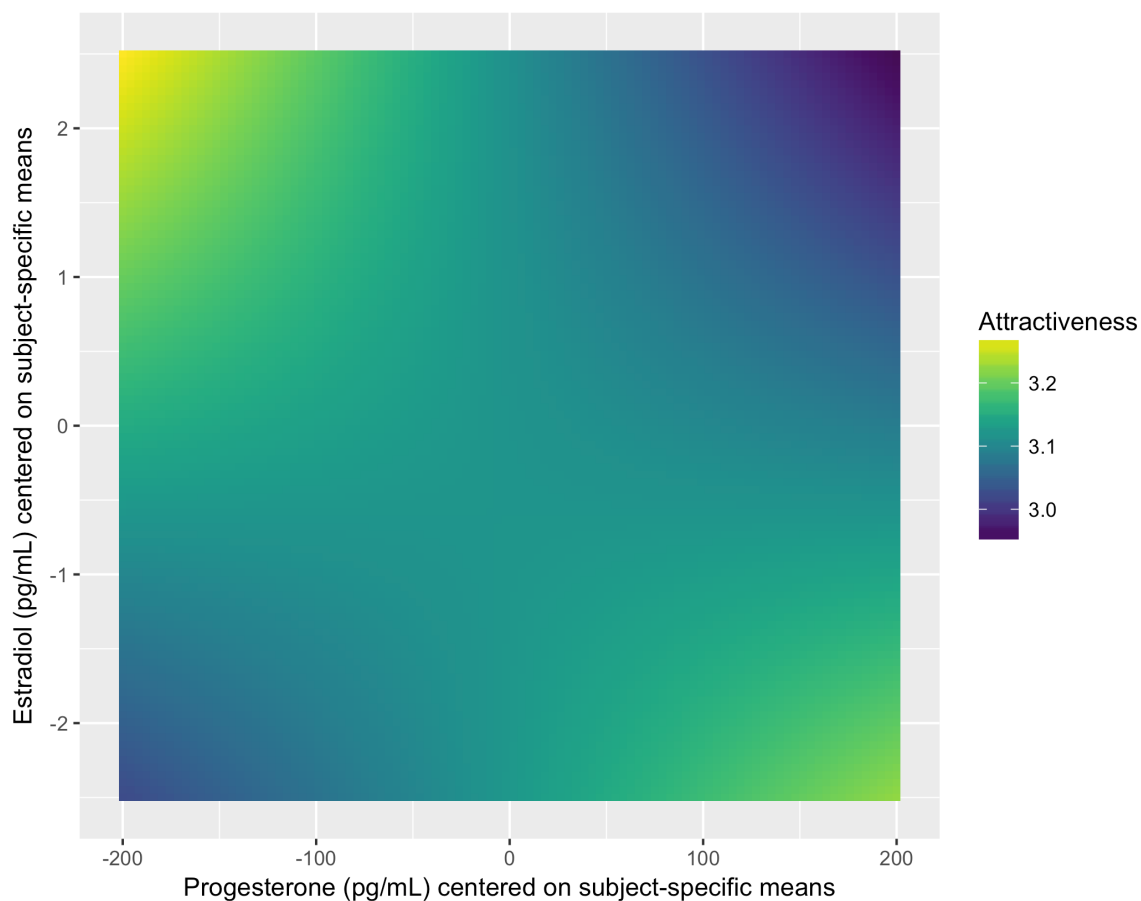

## Model within-woman E and P only

[Hide](#)

```
fit.ep.w <- lmer(rating ~ estr.current.s * prog.current.s * rater_sex.e +
  (1 | face_id) +
  (0 + estr.current.s:prog.current.s:rater_sex.e || face_id) +
  (1 | rater_id) +
  (0 + estr.current.s:prog.current.s || rater_id) +
  (1 | face_id:session) +
  (0 + rater_sex.e || face_id:session),
  data = data_hormones,
  REML = FALSE)
model.ep.w <- summary(fit.ep.w)
model.ep.w
```

Linear mixed model fit by maximum likelihood t-tests use Satterthwaite approximations to degrees of freedom [lmerMod]

```
Formula: rating ~ estr.current.s * prog.current.s * rater_sex.e + (1 |
  face_id) + ((0 + estr.current.s:prog.current.s:rater_sex.e |
  face_id)) + (1 | rater_id) + ((0 + estr.current.s:prog.current.s |
  rater_id)) + (1 | face_id:session) + ((0 + rater_sex.e |
  face_id:session))
Data: data_hormones
```

| AIC     | BIC     | logLik   | deviance | df.resid |
|---------|---------|----------|----------|----------|
| 97995.2 | 98121.7 | -48982.6 | 97965.2  | 33949    |

Scaled residuals:

| Min     | 1Q      | Median  | 3Q     | Max    |
|---------|---------|---------|--------|--------|
| -4.5749 | -0.6415 | -0.0445 | 0.5961 | 4.6113 |

Random effects:

| Groups            | Name                                      | Variance  | Std.Dev. |
|-------------------|-------------------------------------------|-----------|----------|
| face_id.session   | rater_sex.e                               | 0.0005417 | 0.02328  |
| face_id.session.1 | (Intercept)                               | 0.0140041 | 0.11834  |
| face_id           | estr.current.s:prog.current.s:rater_sex.e | 3.1021380 | 1.76129  |
| face_id.1         | (Intercept)                               | 0.4426018 | 0.66528  |
| rater_id          | estr.current.s:prog.current.s             | 0.0274750 | 0.16576  |
| rater_id.1        | (Intercept)                               | 0.4590850 | 0.67756  |
| Residual          |                                           | 1.0010742 | 1.00054  |

Number of obs: 33964, groups: face\_id:session, 1213; face\_id, 249; rater\_id, 28

Fixed effects:

|                                           | Estimate | Std. Error | df         | t value | Pr(> t )   |
|-------------------------------------------|----------|------------|------------|---------|------------|
| (Intercept)                               | 3.12707  | 0.13498    | 34.40000   | 23.168  | <2e-16 *** |
| estr.current.s                            | -0.01038 | 0.04518    | 964.40000  | -0.230  | 0.8183     |
| prog.current.s                            | -0.06517 | 0.03935    | 964.50000  | -1.656  | 0.0980 .   |
| rater_sex.e                               | -0.69360 | 0.25635    | 28.00000   | -2.706  | 0.0115 *   |
| estr.current.s:prog.current.s             | -0.53740 | 0.24364    | 85.00000   | -2.206  | 0.0301 *   |
| estr.current.s:rater_sex.e                | 0.01935  | 0.07765    | 1199.80000 | 0.249   | 0.8033     |
| prog.current.s:rater_sex.e                | -0.02375 | 0.06811    | 1078.80000 | -0.349  | 0.7274     |
| estr.current.s:prog.current.s:rater_sex.e | 0.39741  | 0.44197    | 30.80000   | 0.899   | 0.3755     |

---

Signif. codes: 0 '\*\*\*' 0.001 '\*\*' 0.01 '\*' 0.05 '.' 0.1 ' ' 1

Correlation of Fixed Effects:

|             | (Intr) | estr.. | prg.c. | rtr_s. | es...: | e...:  | p...:  |
|-------------|--------|--------|--------|--------|--------|--------|--------|
| estr.crrnt. | 0.001  |        |        |        |        |        |        |
| prg.crrnt.s | 0.002  | -0.312 |        |        |        |        |        |
| rater_sex.e | 0.000  | 0.000  | 0.000  |        |        |        |        |
| estr.cr...: | -0.014 | -0.029 | -0.109 | 0.000  |        |        |        |
| estr.cr.:_. | 0.000  | 0.000  | 0.000  | 0.001  | 0.000  |        |        |
| prg.crr.:_. | 0.000  | 0.000  | 0.000  | 0.002  | 0.000  | -0.298 |        |
| est...:._.  | 0.000  | 0.000  | 0.000  | -0.011 | 0.000  | -0.016 | -0.073 |

Hide

```
confint(fit.ep.w, method = "Wald") %>%
  as.data.frame() %>%
  rownames_to_column() %>%
  filter(!is.na(`2.5 %`)) %>%
  kable(digits = 3)
```

| rowname                                   | 2.5 %  | 97.5 % |
|-------------------------------------------|--------|--------|
| (Intercept)                               | 2.863  | 3.392  |
| estr.current.s                            | -0.099 | 0.078  |
| prog.current.s                            | -0.142 | 0.012  |
| rater_sex.e                               | -1.196 | -0.191 |
| estr.current.s:prog.current.s             | -1.015 | -0.060 |
| estr.current.s:rater_sex.e                | -0.133 | 0.172  |
| prog.current.s:rater_sex.e                | -0.157 | 0.110  |
| estr.current.s:prog.current.s:rater_sex.e | -0.469 | 1.264  |

## Model between-women E and P only

Hide



```
fit.ep.h <- lmer(rating ~ estr.mean.s * prog.mean.s * rater_sex.e +
  (1 | face_id) +
  (0 + rater_sex.e || face_id) +
  (1 | rater_id) +
  (0 + estr.mean.s:prog.mean.s | rater_id) +
  (1 | face_id:session) +
  (0 + rater_sex.e || face_id:session),
  data = data_hormones,
  REML = FALSE)
model.ep.h <- summary(fit.ep.h)
model.ep.h
```

Linear mixed model fit by maximum likelihood t-tests use Satterthwaite approximations to degrees of freedom [lmerMod]

```
Formula: rating ~ estr.mean.s * prog.mean.s * rater_sex.e + (1 | face_id) +
  ((0 + rater_sex.e | face_id) + (1 | rater_id) + (0 + estr.mean.s:prog.mean.s |
  rater_id) + (1 | face_id:session) + ((0 + rater_sex.e | face_id:session))
Data: data_hormones
```

| AIC     | BIC     | logLik   | deviance | df.resid |
|---------|---------|----------|----------|----------|
| 97934.9 | 98061.4 | -48952.4 | 97904.9  | 33949    |

Scaled residuals:

| Min     | 1Q      | Median  | 3Q     | Max    |
|---------|---------|---------|--------|--------|
| -4.4427 | -0.6369 | -0.0424 | 0.5954 | 4.4887 |

Random effects:

| Groups            | Name                    | Variance | Std.Dev. |
|-------------------|-------------------------|----------|----------|
| face_id.session   | rater_sex.e             | 0.00000  | 0.0000   |
| face_id.session.1 | (Intercept)             | 0.01476  | 0.1215   |
| face_id           | rater_sex.e             | 0.02640  | 0.1625   |
| face_id.1         | (Intercept)             | 0.43952  | 0.6630   |
| rater_id          | estr.mean.s:prog.mean.s | 0.72132  | 0.8493   |
| rater_id.1        | (Intercept)             | 0.45463  | 0.6743   |
| Residual          |                         | 0.99433  | 0.9972   |

Number of obs: 33964, groups: face\_id:session, 1213; face\_id, 249; rater\_id, 28

Fixed effects:

|                                     | Estimate  | Std. Error | df         | t value | Pr(> t )   |
|-------------------------------------|-----------|------------|------------|---------|------------|
| (Intercept)                         | 3.113916  | 0.135284   | 35.360000  | 23.018  | <2e-16 *** |
| estr.mean.s                         | -0.154100 | 0.209277   | 248.450000 | -0.736  | 0.4622     |
| prog.mean.s                         | -0.062047 | 0.288171   | 249.290000 | -0.215  | 0.8297     |
| rater_sex.e                         | -0.693967 | 0.255350   | 28.100000  | -2.718  | 0.0111 *   |
| estr.mean.s:prog.mean.s             | 0.673933  | 1.218583   | 254.850000 | 0.553   | 0.5807     |
| estr.mean.s:rater_sex.e             | 0.007665  | 0.073972   | 248.680000 | 0.104   | 0.9176     |
| prog.mean.s:rater_sex.e             | -0.109288 | 0.103294   | 260.550000 | -1.058  | 0.2910     |
| estr.mean.s:prog.mean.s:rater_sex.e | 0.216369  | 0.536036   | 50.680000  | 0.404   | 0.6882     |

---  
Signif. codes: 0 '\*\*\*' 0.001 '\*\*' 0.01 '\*' 0.05 '.' 0.1 ' ' 1

Correlation of Fixed Effects:

|             | (Intr) | estr.. | prg.m. | rtr_s. | es.... | e.:_.  | p.:_.  |
|-------------|--------|--------|--------|--------|--------|--------|--------|
| estr.mean.s | 0.005  |        |        |        |        |        |        |
| prog.mean.s | 0.003  | -0.378 |        |        |        |        |        |
| rater_sex.e | 0.000  | 0.000  | 0.000  |        |        |        |        |
| estr.mn..._ | -0.118 | -0.042 | -0.019 | 0.000  |        |        |        |
| estr.mn.:_. | 0.000  | 0.000  | 0.000  | 0.001  | 0.000  |        |        |
| prg.mn.s:._ | 0.000  | 0.000  | 0.000  | 0.002  | 0.000  | -0.386 |        |
| est....._.  | 0.000  | 0.000  | 0.000  | -0.018 | 0.000  | -0.020 | -0.023 |

Hide

```
confint(fit.ep.h, method = "Wald") %>%
  as.data.frame() %>%
  rownames_to_column() %>%
  filter(!is.na(`2.5 %`)) %>%
  kable(digits = 3)
```

| rowname     | 2.5 %  | 97.5 % |
|-------------|--------|--------|
| (Intercept) | 2.849  | 3.379  |
| estr.mean.s | -0.564 | 0.256  |
| prog.mean.s | -0.627 | 0.503  |

| rowname                             | 2.5 %  | 97.5 % |
|-------------------------------------|--------|--------|
| rater_sex.e                         | -1.194 | -0.193 |
| estr.mean.s:prog.mean.s             | -1.714 | 3.062  |
| estr.mean.s:rater_sex.e             | -0.137 | 0.153  |
| prog.mean.s:rater_sex.e             | -0.312 | 0.093  |
| estr.mean.s:prog.mean.s:rater_sex.e | -0.834 | 1.267  |

## Waist-to-hip ratio and mean hormone levels

[Hide](#)

```
data_whr <- data_hormones %>%
  group_by(face_id, prog.mean.s, estr.mean.s, whr) %>%
  summarise()
WHRm <- mean(data_whr$whr, na.rm=TRUE)
WHRsd <- sd(data_whr$whr, na.rm=TRUE)
paste0("WHR mean = ", round(WHRm, 3) , ", SD = ", round(WHRsd, 3) )
```

```
[1] "WHR mean = 0.751, SD = 0.054"
```

## WHR-Estradiol correlation

[Hide](#)

```
cor.test(data_whr$whr, data_whr$estr.mean.s)
```

```
Pearson's product-moment correlation

data: data_whr$whr and data_whr$estr.mean.s
t = 3.6758, df = 246, p-value = 0.0002911
alternative hypothesis: true correlation is not equal to 0
95 percent confidence interval:
 0.1066422 0.3429962
sample estimates:
      cor
-0.2281782
```

## WHR-Progesterone correlation

[Hide](#)

```
cor.test(data_whr$whr, data_whr$prog.mean.s)
```

```
Pearson's product-moment correlation

data: data_whr$whr and data_whr$prog.mean.s
t = -1.1686, df = 246, p-value = 0.2437
alternative hypothesis: true correlation is not equal to 0
95 percent confidence interval:
-0.19704476 0.05073535
sample estimates:
      cor
-0.07430137
```
